# Supplementary material for: Deep Learning Neural Networks Highly Predict Very Early Onset of Pluripotent Stem Cell Differentiation
Source: PubMed Central journal article supplement (PMC6449871; doi:10.1016/j.stemcr.2019.02.004), 2019-03-14
Supplement: mmc3.pdf [file mmc3.pdf]

## DesneNet

| Layer (type)                                  | Output Shape         | Param # | Connected to                             |
|-----------------------------------------------|----------------------|---------|------------------------------------------|
| input_2 (InputLayer)                          | (None, 240, 320, 3)  | 0       |                                          |
| conv2d_100 (Conv2D)                           | (None, 240, 320, 24) | 648     | input_2[0][0]                            |
| batch_normalization_100 (Batch Normalization) | (None, 240, 320, 24) | 96      | conv2d_100[0][0]                         |
| activation_100 (Activation)                   | (None, 240, 320, 24) | 0       | batch_normalization_100[0][0]            |
| conv2d_101 (Conv2D)                           | (None, 240, 320, 48) | 1152    | activation_100[0][0]                     |
| batch_normalization_101 (Batch Normalization) | (None, 240, 320, 48) | 192     | conv2d_101[0][0]                         |
| activation_101 (Activation)                   | (None, 240, 320, 48) | 0       | batch_normalization_101[0][0]            |
| conv2d_102 (Conv2D)                           | (None, 240, 320, 12) | 5184    | activation_101[0][0]                     |
| concatenate_49 (Concatenate)                  | (None, 240, 320, 36) | 0       | conv2d_100[0][0]<br>conv2d_102[0][0]     |
| batch_normalization_102 (Batch Normalization) | (None, 240, 320, 36) | 144     | concatenate_49[0][0]                     |
| activation_102 (Activation)                   | (None, 240, 320, 36) | 0       | batch_normalization_102[0][0]            |
| conv2d_103 (Conv2D)                           | (None, 240, 320, 48) | 1728    | activation_102[0][0]                     |
| batch_normalization_103 (Batch Normalization) | (None, 240, 320, 48) | 192     | conv2d_103[0][0]                         |
| activation_103 (Activation)                   | (None, 240, 320, 48) | 0       | batch_normalization_103[0][0]            |
| conv2d_104 (Conv2D)                           | (None, 240, 320, 12) | 5184    | activation_103[0][0]                     |
| concatenate_50 (Concatenate)                  | (None, 240, 320, 48) | 0       | concatenate_49[0][0]<br>conv2d_104[0][0] |
| batch_normalization_104 (Batch Normalization) | (None, 240, 320, 48) | 192     | concatenate_50[0][0]                     |
| activation_104 (Activation)                   | (None, 240, 320, 48) | 0       | batch_normalization_104[0][0]            |
| conv2d_105 (Conv2D)                           | (None, 240, 320, 48) | 2304    | activation_104[0][0]                     |
| batch_normalization_105 (Batch Normalization) | (None, 240, 320, 48) | 192     | conv2d_105[0][0]                         |
| activation_105 (Activation)                   | (None, 240, 320, 48) | 0       | batch_normalization_105[0][0]            |
| conv2d_106 (Conv2D)                           | (None, 240, 320, 12) | 5184    | activation_105[0][0]                     |

|                                 |                           |                                          |
|---------------------------------|---------------------------|------------------------------------------|
| concatenate_51 (Concatenate)    | (None, 240, 320, 60) 0    | concatenate_50[0][0]<br>conv2d_106[0][0] |
| batch_normalization_106 (BatchN | (None, 240, 320, 60) 240  | concatenate_51[0][0]                     |
| activation_106 (Activation)     | (None, 240, 320, 60) 0    | batch_normalization_106[0][0]            |
| conv2d_107 (Conv2D)             | (None, 240, 320, 48) 2880 | activation_106[0][0]                     |
| batch_normalization_107 (BatchN | (None, 240, 320, 48) 192  | conv2d_107[0][0]                         |
| activation_107 (Activation)     | (None, 240, 320, 48) 0    | batch_normalization_107[0][0]            |
| conv2d_108 (Conv2D)             | (None, 240, 320, 12) 5184 | activation_107[0][0]                     |
| concatenate_52 (Concatenate)    | (None, 240, 320, 72) 0    | concatenate_51[0][0]<br>conv2d_108[0][0] |
| batch_normalization_108 (BatchN | (None, 240, 320, 72) 288  | concatenate_52[0][0]                     |
| activation_108 (Activation)     | (None, 240, 320, 72) 0    | batch_normalization_108[0][0]            |
| conv2d_109 (Conv2D)             | (None, 240, 320, 48) 3456 | activation_108[0][0]                     |
| batch_normalization_109 (BatchN | (None, 240, 320, 48) 192  | conv2d_109[0][0]                         |
| activation_109 (Activation)     | (None, 240, 320, 48) 0    | batch_normalization_109[0][0]            |
| conv2d_110 (Conv2D)             | (None, 240, 320, 12) 5184 | activation_109[0][0]                     |
| concatenate_53 (Concatenate)    | (None, 240, 320, 84) 0    | concatenate_52[0][0]<br>conv2d_110[0][0] |
| batch_normalization_110 (BatchN | (None, 240, 320, 84) 336  | concatenate_53[0][0]                     |
| activation_110 (Activation)     | (None, 240, 320, 84) 0    | batch_normalization_110[0][0]            |
| conv2d_111 (Conv2D)             | (None, 240, 320, 48) 4032 | activation_110[0][0]                     |
| batch_normalization_111 (BatchN | (None, 240, 320, 48) 192  | conv2d_111[0][0]                         |
| activation_111 (Activation)     | (None, 240, 320, 48) 0    | batch_normalization_111[0][0]            |
| conv2d_112 (Conv2D)             | (None, 240, 320, 12) 5184 | activation_111[0][0]                     |
| concatenate_54 (Concatenate)    | (None, 240, 320, 96) 0    | concatenate_53[0][0]<br>conv2d_112[0][0] |
| batch_normalization_112 (BatchN | (None, 240, 320, 96) 384  | concatenate_54[0][0]                     |

|                                   |                           |                                               |
|-----------------------------------|---------------------------|-----------------------------------------------|
| activation_112 (Activation)       | (None, 240, 320, 96) 0    | batch_normalization_112[0][0]                 |
| conv2d_113 (Conv2D)               | (None, 240, 320, 48) 4608 | activation_112[0][0]                          |
| average_pooling2d_3 (AveragePool) | (None, 120, 160, 48) 0    | conv2d_113[0][0]                              |
| batch_normalization_113 (BatchN)  | (None, 120, 160, 48) 192  | average_pooling2d_3[0][0]                     |
| activation_113 (Activation)       | (None, 120, 160, 48) 0    | batch_normalization_113[0][0]                 |
| conv2d_114 (Conv2D)               | (None, 120, 160, 48) 2304 | activation_113[0][0]                          |
| batch_normalization_114 (BatchN)  | (None, 120, 160, 48) 192  | conv2d_114[0][0]                              |
| activation_114 (Activation)       | (None, 120, 160, 48) 0    | batch_normalization_114[0][0]                 |
| conv2d_115 (Conv2D)               | (None, 120, 160, 12) 5184 | activation_114[0][0]                          |
| concatenate_55 (Concatenate)      | (None, 120, 160, 60) 0    | average_pooling2d_3[0][0]<br>conv2d_115[0][0] |
| batch_normalization_115 (BatchN)  | (None, 120, 160, 60) 240  | concatenate_55[0][0]                          |
| activation_115 (Activation)       | (None, 120, 160, 60) 0    | batch_normalization_115[0][0]                 |
| conv2d_116 (Conv2D)               | (None, 120, 160, 48) 2880 | activation_115[0][0]                          |
| batch_normalization_116 (BatchN)  | (None, 120, 160, 48) 192  | conv2d_116[0][0]                              |
| activation_116 (Activation)       | (None, 120, 160, 48) 0    | batch_normalization_116[0][0]                 |
| conv2d_117 (Conv2D)               | (None, 120, 160, 12) 5184 | activation_116[0][0]                          |
| concatenate_56 (Concatenate)      | (None, 120, 160, 72) 0    | concatenate_55[0][0]<br>conv2d_117[0][0]      |
| batch_normalization_117 (BatchN)  | (None, 120, 160, 72) 288  | concatenate_56[0][0]                          |
| activation_117 (Activation)       | (None, 120, 160, 72) 0    | batch_normalization_117[0][0]                 |
| conv2d_118 (Conv2D)               | (None, 120, 160, 48) 3456 | activation_117[0][0]                          |
| batch_normalization_118 (BatchN)  | (None, 120, 160, 48) 192  | conv2d_118[0][0]                              |
| activation_118 (Activation)       | (None, 120, 160, 48) 0    | batch_normalization_118[0][0]                 |
| conv2d_119 (Conv2D)               | (None, 120, 160, 12) 5184 | activation_118[0][0]                          |
| concatenate_57 (Concatenate)      | (None, 120, 160, 84) 0    | concatenate_56[0][0]<br>conv2d_119[0][0]      |

|                                 |                           |                                          |
|---------------------------------|---------------------------|------------------------------------------|
| batch_normalization_119 (BatchN | (None, 120, 160, 84) 336  | concatenate_57[0][0]                     |
| activation_119 (Activation)     | (None, 120, 160, 84) 0    | batch_normalization_119[0][0]            |
| conv2d_120 (Conv2D)             | (None, 120, 160, 48) 4032 | activation_119[0][0]                     |
| batch_normalization_120 (BatchN | (None, 120, 160, 48) 192  | conv2d_120[0][0]                         |
| activation_120 (Activation)     | (None, 120, 160, 48) 0    | batch_normalization_120[0][0]            |
| conv2d_121 (Conv2D)             | (None, 120, 160, 12) 5184 | activation_120[0][0]                     |
| concatenate_58 (Concatenate)    | (None, 120, 160, 96) 0    | concatenate_57[0][0]<br>conv2d_121[0][0] |
| batch_normalization_121 (BatchN | (None, 120, 160, 96) 384  | concatenate_58[0][0]                     |
| activation_121 (Activation)     | (None, 120, 160, 96) 0    | batch_normalization_121[0][0]            |
| conv2d_122 (Conv2D)             | (None, 120, 160, 48) 4608 | activation_121[0][0]                     |
| batch_normalization_122 (BatchN | (None, 120, 160, 48) 192  | conv2d_122[0][0]                         |
| activation_122 (Activation)     | (None, 120, 160, 48) 0    | batch_normalization_122[0][0]            |
| conv2d_123 (Conv2D)             | (None, 120, 160, 12) 5184 | activation_122[0][0]                     |
| concatenate_59 (Concatenate)    | (None, 120, 160, 108) 0   | concatenate_58[0][0]<br>conv2d_123[0][0] |
| batch_normalization_123 (BatchN | (None, 120, 160, 108) 432 | concatenate_59[0][0]                     |
| activation_123 (Activation)     | (None, 120, 160, 108) 0   | batch_normalization_123[0][0]            |
| conv2d_124 (Conv2D)             | (None, 120, 160, 48) 5184 | activation_123[0][0]                     |
| batch_normalization_124 (BatchN | (None, 120, 160, 48) 192  | conv2d_124[0][0]                         |
| activation_124 (Activation)     | (None, 120, 160, 48) 0    | batch_normalization_124[0][0]            |
| conv2d_125 (Conv2D)             | (None, 120, 160, 12) 5184 | activation_124[0][0]                     |
| concatenate_60 (Concatenate)    | (None, 120, 160, 120) 0   | concatenate_59[0][0]<br>conv2d_125[0][0] |
| batch_normalization_125 (BatchN | (None, 120, 160, 120) 480 | concatenate_60[0][0]                     |
| activation_125 (Activation)     | (None, 120, 160, 120) 0   | batch_normalization_125[0][0]            |
| conv2d_126 (Conv2D)             | (None, 120, 160, 60) 7200 | activation_125[0][0]                     |

|                                               |                    |      |                                               |
|-----------------------------------------------|--------------------|------|-----------------------------------------------|
| average_pooling2d_4 (AveragePool)             | (None, 60, 80, 60) | 0    | conv2d_126[0][0]                              |
| batch_normalization_126 (Batch Normalization) | (None, 60, 80, 60) | 240  | average_pooling2d_4[0][0]                     |
| activation_126 (Activation)                   | (None, 60, 80, 60) | 0    | batch_normalization_126[0][0]                 |
| conv2d_127 (Conv2D)                           | (None, 60, 80, 48) | 2880 | activation_126[0][0]                          |
| batch_normalization_127 (Batch Normalization) | (None, 60, 80, 48) | 192  | conv2d_127[0][0]                              |
| activation_127 (Activation)                   | (None, 60, 80, 48) | 0    | batch_normalization_127[0][0]                 |
| conv2d_128 (Conv2D)                           | (None, 60, 80, 12) | 5184 | activation_127[0][0]                          |
| concatenate_61 (Concatenate)                  | (None, 60, 80, 72) | 0    | average_pooling2d_4[0][0]<br>conv2d_128[0][0] |
| batch_normalization_128 (Batch Normalization) | (None, 60, 80, 72) | 288  | concatenate_61[0][0]                          |
| activation_128 (Activation)                   | (None, 60, 80, 72) | 0    | batch_normalization_128[0][0]                 |
| conv2d_129 (Conv2D)                           | (None, 60, 80, 48) | 3456 | activation_128[0][0]                          |
| batch_normalization_129 (Batch Normalization) | (None, 60, 80, 48) | 192  | conv2d_129[0][0]                              |
| activation_129 (Activation)                   | (None, 60, 80, 48) | 0    | batch_normalization_129[0][0]                 |
| conv2d_130 (Conv2D)                           | (None, 60, 80, 12) | 5184 | activation_129[0][0]                          |
| concatenate_62 (Concatenate)                  | (None, 60, 80, 84) | 0    | concatenate_61[0][0]<br>conv2d_130[0][0]      |
| batch_normalization_130 (Batch Normalization) | (None, 60, 80, 84) | 336  | concatenate_62[0][0]                          |
| activation_130 (Activation)                   | (None, 60, 80, 84) | 0    | batch_normalization_130[0][0]                 |
| conv2d_131 (Conv2D)                           | (None, 60, 80, 48) | 4032 | activation_130[0][0]                          |
| batch_normalization_131 (Batch Normalization) | (None, 60, 80, 48) | 192  | conv2d_131[0][0]                              |
| activation_131 (Activation)                   | (None, 60, 80, 48) | 0    | batch_normalization_131[0][0]                 |
| conv2d_132 (Conv2D)                           | (None, 60, 80, 12) | 5184 | activation_131[0][0]                          |
| concatenate_63 (Concatenate)                  | (None, 60, 80, 96) | 0    | concatenate_62[0][0]<br>conv2d_132[0][0]      |
| batch_normalization_132 (Batch Normalization) | (None, 60, 80, 96) | 384  | concatenate_63[0][0]                          |
| activation_132 (Activation)                   | (None, 60, 80, 96) | 0    | batch_normalization_132[0][0]                 |

|                                                     |                     |      |                                          |
|-----------------------------------------------------|---------------------|------|------------------------------------------|
| conv2d_133 (Conv2D)                                 | (None, 60, 80, 48)  | 4608 | activation_132[0][0]                     |
| batch_normalization_133 (Batch Normalization)       | (None, 60, 80, 48)  | 192  | conv2d_133[0][0]                         |
| activation_133 (Activation)                         | (None, 60, 80, 48)  | 0    | batch_normalization_133[0][0]            |
| conv2d_134 (Conv2D)                                 | (None, 60, 80, 12)  | 5184 | activation_133[0][0]                     |
| concatenate_64 (Concatenate)                        | (None, 60, 80, 108) | 0    | concatenate_63[0][0]<br>conv2d_134[0][0] |
| batch_normalization_134 (Batch Normalization)       | (None, 60, 80, 108) | 432  | concatenate_64[0][0]                     |
| activation_134 (Activation)                         | (None, 60, 80, 108) | 0    | batch_normalization_134[0][0]            |
| conv2d_135 (Conv2D)                                 | (None, 60, 80, 48)  | 5184 | activation_134[0][0]                     |
| batch_normalization_135 (Batch Normalization)       | (None, 60, 80, 48)  | 192  | conv2d_135[0][0]                         |
| activation_135 (Activation)                         | (None, 60, 80, 48)  | 0    | batch_normalization_135[0][0]            |
| conv2d_136 (Conv2D)                                 | (None, 60, 80, 12)  | 5184 | activation_135[0][0]                     |
| concatenate_65 (Concatenate)                        | (None, 60, 80, 120) | 0    | concatenate_64[0][0]<br>conv2d_136[0][0] |
| batch_normalization_136 (Batch Normalization)       | (None, 60, 80, 120) | 480  | concatenate_65[0][0]                     |
| activation_136 (Activation)                         | (None, 60, 80, 120) | 0    | batch_normalization_136[0][0]            |
| conv2d_137 (Conv2D)                                 | (None, 60, 80, 48)  | 5760 | activation_136[0][0]                     |
| batch_normalization_137 (Batch Normalization)       | (None, 60, 80, 48)  | 192  | conv2d_137[0][0]                         |
| activation_137 (Activation)                         | (None, 60, 80, 48)  | 0    | batch_normalization_137[0][0]            |
| conv2d_138 (Conv2D)                                 | (None, 60, 80, 12)  | 5184 | activation_137[0][0]                     |
| concatenate_66 (Concatenate)                        | (None, 60, 80, 132) | 0    | concatenate_65[0][0]<br>conv2d_138[0][0] |
| batch_normalization_138 (Batch Normalization)       | (None, 60, 80, 132) | 528  | concatenate_66[0][0]                     |
| activation_138 (Activation)                         | (None, 60, 80, 132) | 0    | batch_normalization_138[0][0]            |
| global_average_pooling2d_2 (Global Average Pooling) | (None, 132)         | 0    | activation_138[0][0]                     |
| dense_2 (Dense)                                     | (None, 2)           | 266  | global_average_pooling2d_2[0][0]         |

=====  
Total params: 180,146

Trainable params: 175,058

Non-trainable params: 5,088

None
